# Supplementary material
Source: publisher site journal article supplement (https://www.dovepress.com/article/584395)
Supplement: Supplementary file 1 [file 584395%20Revised%20Supplementary%20Material.docx]

**
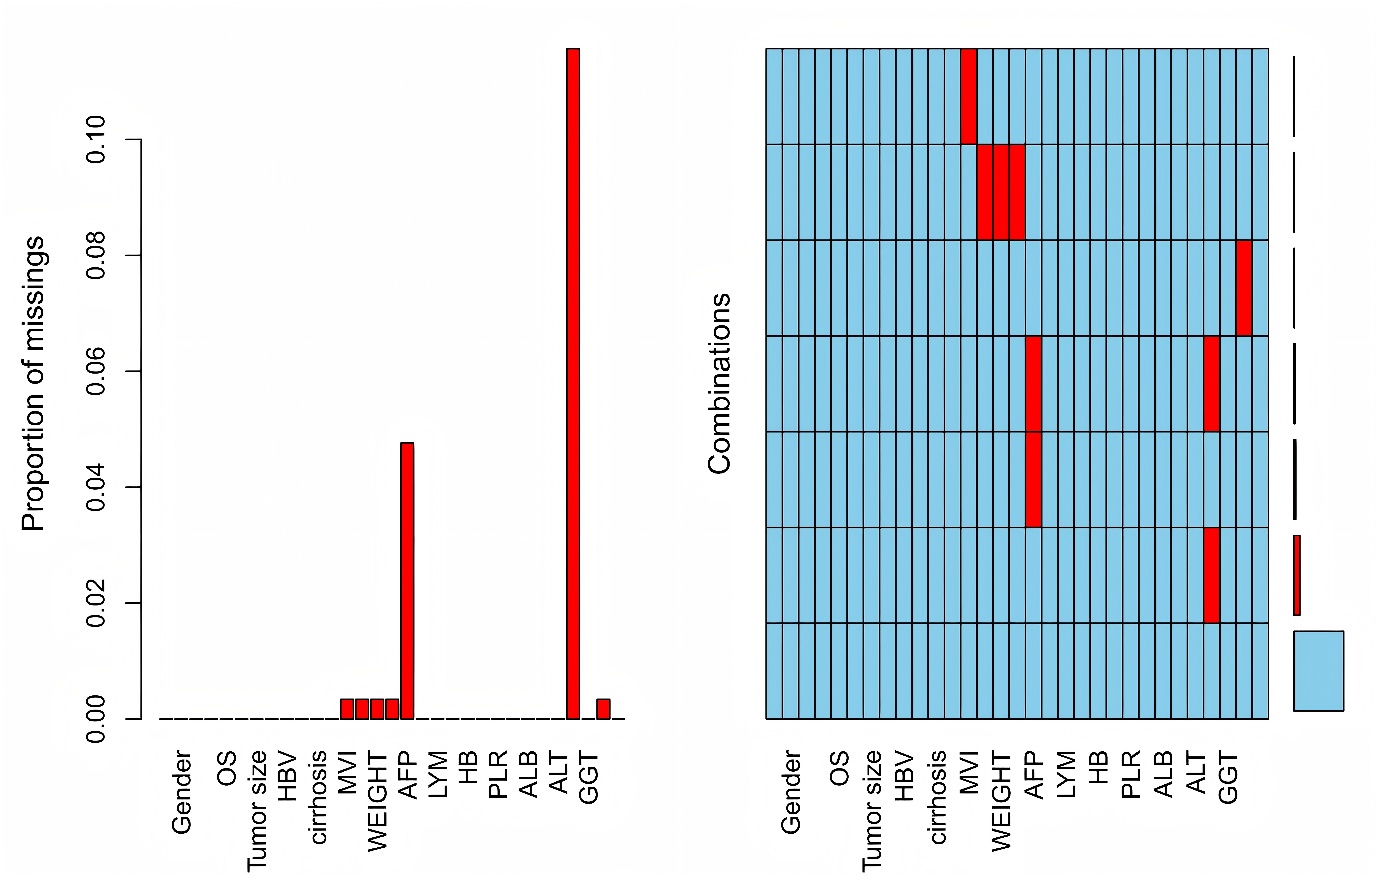
Supplementary Figure S1 Multiple Imputation Results**

**(Blue: observed data; Red: missing data).**

**
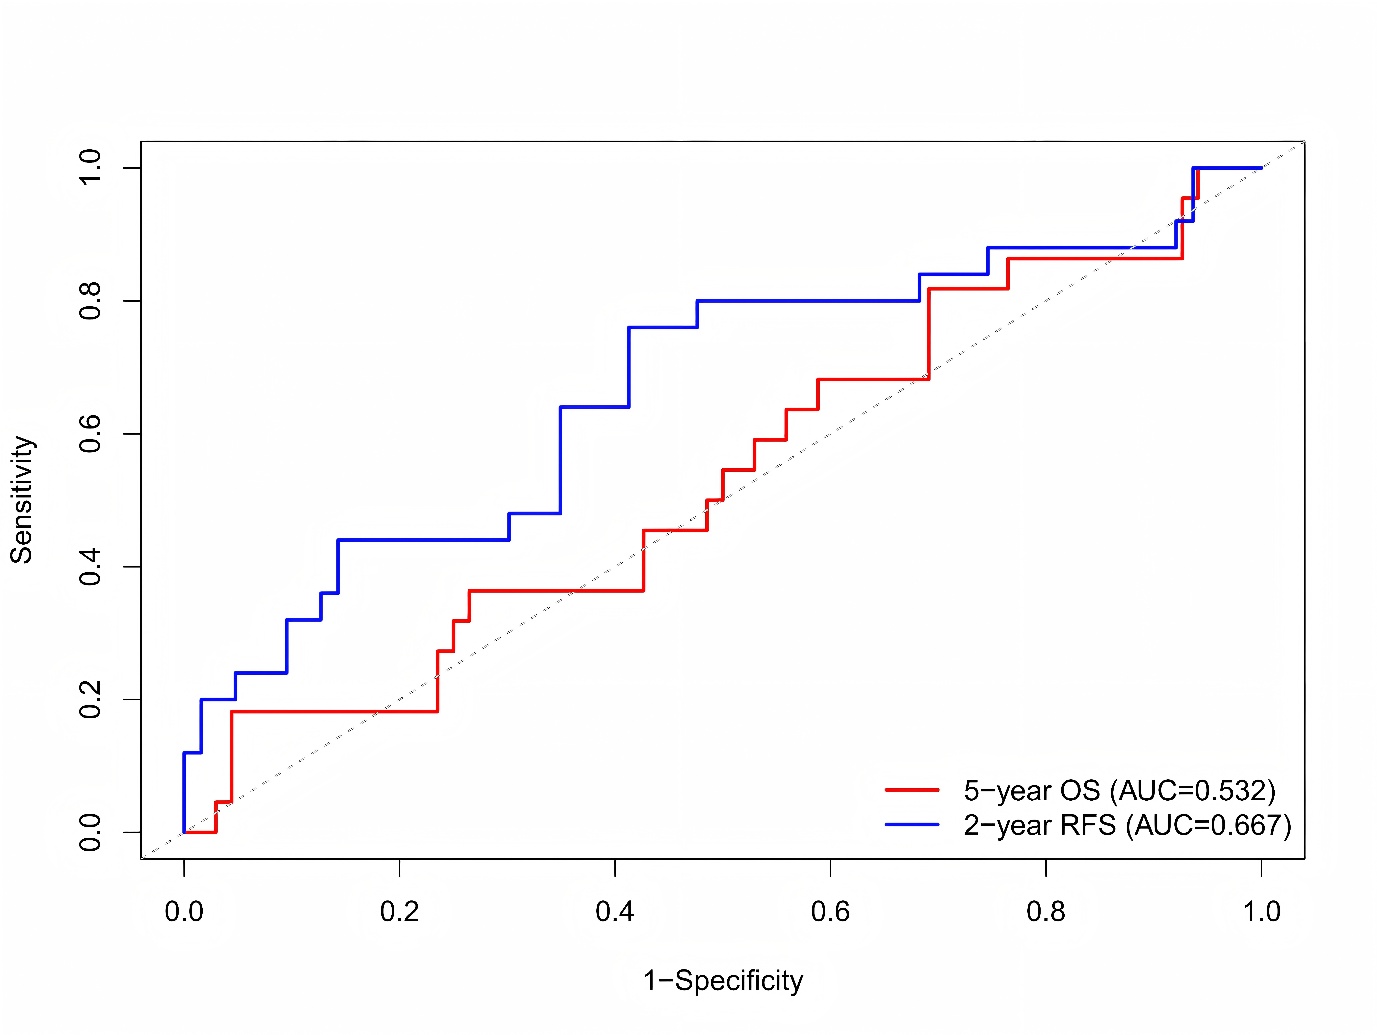
Supplementary Figure S2 ROC curves of the LASSO-Cox model for predicting 5‑year overall survival (OS) and 2‑year recurrence‑free survival (RFS) in the small HCC subgroup (n=90).**

**Supplementary Table S1. Ten fold cross validated time dependent AUCs for the tuned LASSO‑Cox models**

| Outcome | Time | Mean AUC | 95%CI |
| --- | --- | --- | --- |
| OS | 1-year | 0.758 | 0.622-0.895 |
|  | 3-year | 0.718 | 0.611-0.825 |
|  | 5-year | 0.698 | 0.624-0.773 |
| RFS | 1-year | 0.718 | 0.630-0.806 |
|  | 2-year | 0.727 | 0.630-0.784 |
|  | 5-year | 0.794 | 0.673-0.812 |

**Supplementary Table S2. Ten‑fold cross‑validated time‑dependent AUCs for the tuned XGBoost model**

| Outcome | Time | Mean AUC | 95%CI |
| --- | --- | --- | --- |
| OS | 1-year | 0.671 | 0.489-0.854 |
|  | 3-year | 0.714 | 0.603-0.826 |
|  | 5-year | 0.646 | 0.543-0.750 |
| RFS | 1-year | 0.715 | 0.648-0.781 |
|  | 2-year | 0.708 | 0.620-0.795 |
|  | 5-year | 0.751 | 0.653-0.849 |
